# Supplementary material for: 2,4,6-Triphenyl-1-hexene, an Anti-Melanogenic Compound from Marine-Derived Bacillus sp. APmarine135
Source: MDPI journal article supplement (doi:10.3390/md22020072), 2024-01-30

## 2,4,6-Triphenyl-1-hexene, an Anti-Melanogenic Compound from Marine-Derived *Bacillus* sp. APmarine135

Hye Yeon Kim <sup>1,†</sup>, Hye-Yeon Do <sup>2,†</sup>, Saitbyul Park <sup>3</sup>, Keon Woo Kim <sup>4</sup>, Daejin Min <sup>3</sup>, Eun-Young Lee <sup>2</sup>, Dabin Shim <sup>1</sup>, Sung Yeon Cho <sup>3</sup>, Jin Oh Park <sup>4</sup>, Chang Seok Lee <sup>1,\*</sup>, Sang-Jip Nam <sup>2,\*</sup> and Jaeyoung Ko <sup>3,\*</sup>

<sup>1</sup> Department of Beauty and Cosmetic Science, Eulji University, Seongnam 13135, Republic of Korea; khh6261@naver.com (H.Y.K.); ejsdb0126@naver.com (D.S.)

<sup>2</sup> Department of Chemistry and Nanoscience, Ewha Womans University, Seoul 03760, Republic of Korea; tkfkdg05397@gmail.com (H.-Y.D.); younglee0124@naver.com (E.-Y.L.)

<sup>3</sup> Basic Research & Innovation Division, AMOREPACIFIC R&I Center, Yongin 17074, Republic of Korea; sbpark0819@amorepacific.com (S.P.); dmin@amorepacific.com (D.M.); csy123@amorepacific.com (S.Y.C.)

<sup>4</sup> Department of Natural Product Laboratory, Daebong LS Co., Ltd., Incheon 21697, Republic of Korea; kw.kim@daebongls.co.kr (K.W.K.); pjoh0303@daebongls.co.kr (J.O.P.)

\* Correspondence: cslee2010@eulji.ac.kr (C.S.L.); sjnam@ewha.ac.kr (S.-J.N.); jaeyoungko@amorepacific.com (J.K.)

† These authors contributed equally to this work.

## Table of Contents

|                                                                                                                   |    |
|-------------------------------------------------------------------------------------------------------------------|----|
| Figure S1 $^1\text{H}$ NMR spectrum (400 MHz, $\text{CDCl}_3$ ) of 2,4,6-triphenyl-1-hexene ( <b>1</b> ) .....    | S3 |
| Figure S2 $^{13}\text{C}$ NMR spectrum (100 MHz, $\text{CDCl}_3$ ) of 2,4,6-triphenyl-1-hexene ( <b>1</b> ) ..... | S4 |

**Figure S1**  $^1\text{H}$  NMR spectrum (400 MHz,  $\text{CDCl}_3$ ) of 2,4,6-triphenyl-1-hexene (**1**)

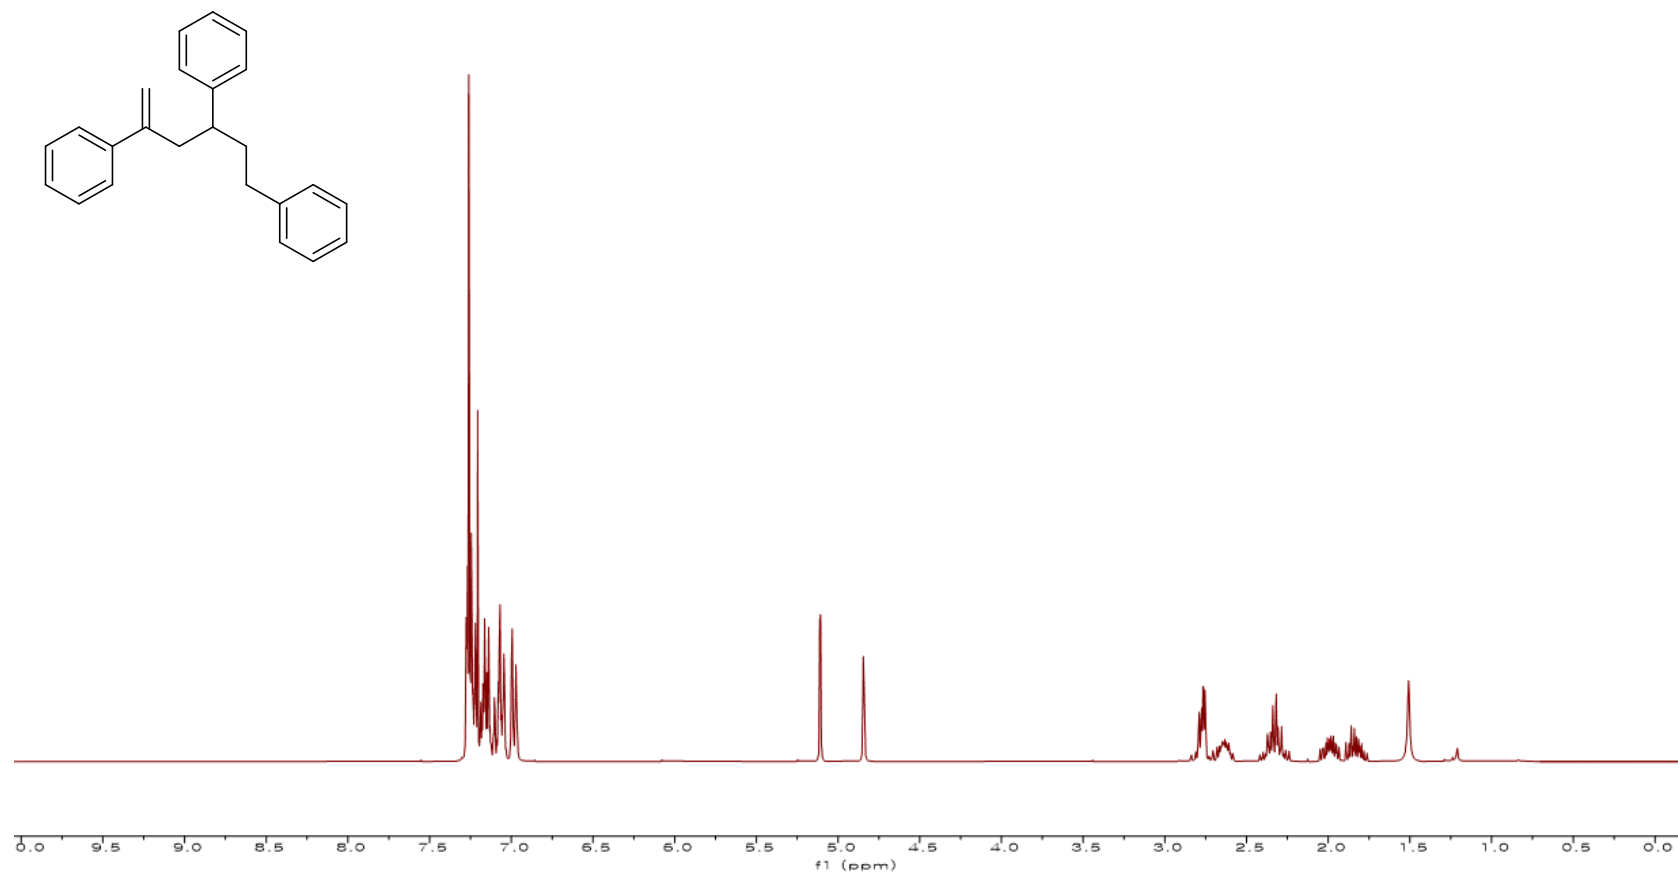

**Figure S2**  $^{13}\text{C}$  NMR spectrum (100 MHz,  $\text{CDCl}_3$ ) of 2,4,6-triphenyl-1-hexene (**1**)

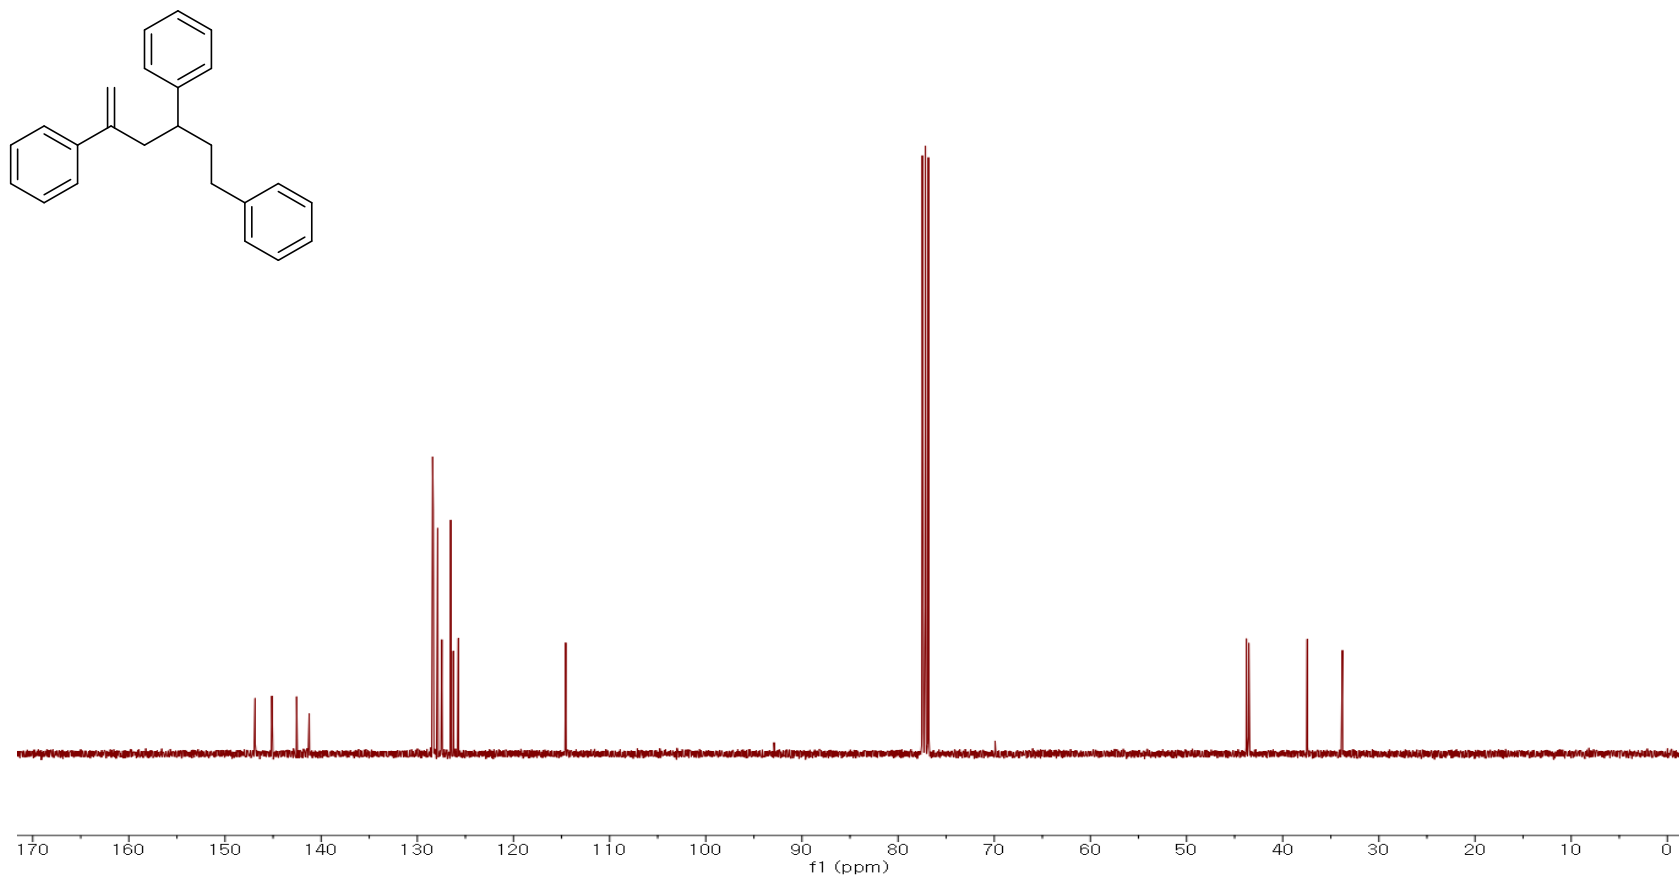

Supplement: s1 [file s1]
